# Supplementary material for: 3D microfluidic chips with integrated functional microelements fabricated by a femtosecond laser for studying the gliding mechanism of cyanobacteria
Source: Royal Society of Chemistry journal article supplement (doi:10.1039/c1lc20101h), 2011-01-01
Supplement: c1lc20101h.pdf [file c1lc20101h.pdf]

# **3D Microfluidic Chips with Integrated Functional Microelements Fabricated by Femtosecond Laser for Studying the Gliding Mechanism of Cyanobacteria**

Yasutaka Hanada<sup>\*a</sup>, Koji Sugioka<sup>a</sup>, Ikuko Shihira-Ishikawa<sup>b</sup>,  
Hiroyuki Kawano<sup>b</sup>, Atsushi Miyawaki<sup>b</sup> and Katsumi Midorikawa<sup>a</sup>

<sup>a</sup> RIKEN-Advanced Science Institute, 2-1 Hirosawa, Wako, Saitama, Japan.  
Fax:+81 48462 4682; Tel:+81 48467 9502; E-mail:y-hanada@riken.jp

<sup>b</sup> RIKEN-Brain Science Institute, 2-1 Hirosawa, Wako, Saitama, Japan.

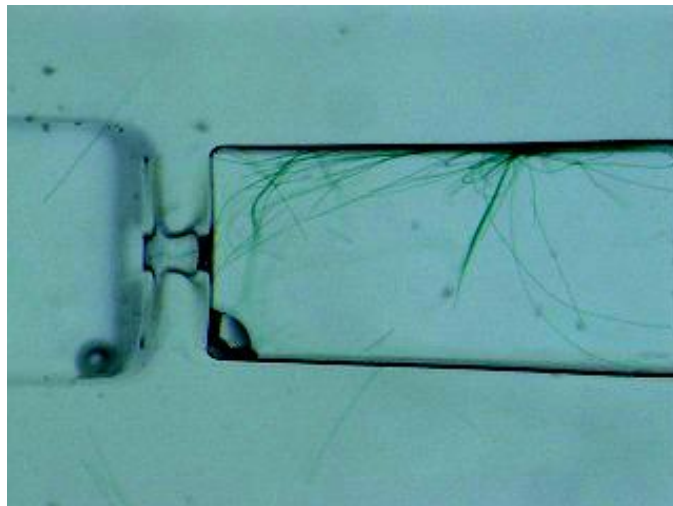

Figure S1: Enlarged image of *Phormidium* gliding to the high-CO<sub>2</sub> concentration region. Within 50 min, part of the *Phormidium* glided and attached to the exit of narrow microfluidic channel connecting to the left reservoir, which was filled with carbonic water having a high CO<sub>2</sub> concentration (50 ml CO<sub>2</sub> : 50 ml H<sub>2</sub>O).

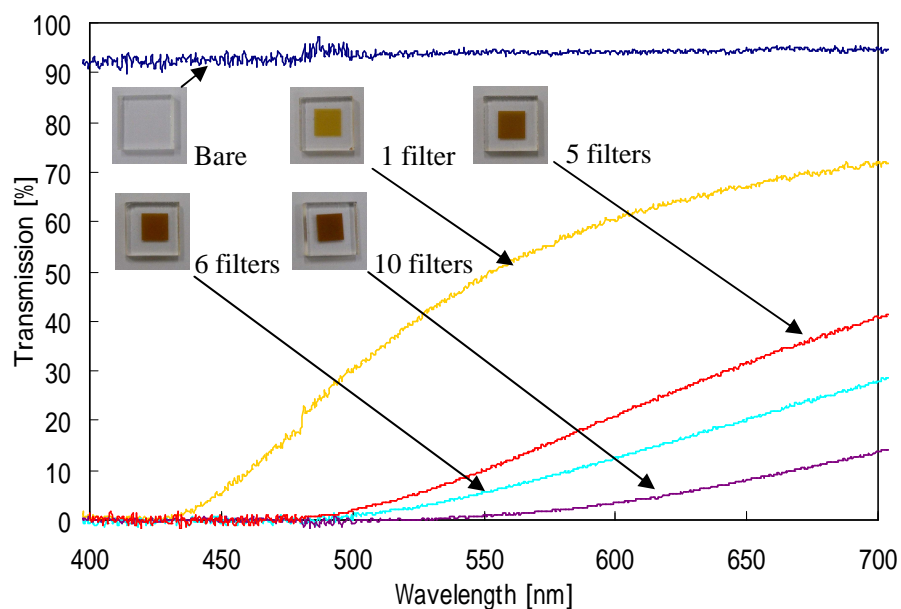

Figure S2: Transmission spectra of untreated Foturan glass and Foturan glasses integrated with optical filters of one, five, six and ten layers. The filter dimensions are 5 mm  $\times$  5 mm. The average transmittance in the wavelength range from 400 to 700 nm is evaluated to be 41 % for one layer, 14 % for five layers, 9 % for six layers and 3 % for ten layers.

Movie S1: *Phormidium* gliding in a T-shaped microfluidic channel. Images were taken every 3 min, and the video plays at 3 frames/s.

Movie S2: *Phormidium* gliding to the seedling root in a microfluidic channel covered with five layers of optical filters. *Phormidium* is gliding in the microfluidic channel toward the seedling root. Images were taken every 7 min, and the movie plays at 3 frames/s.

Movie S3: *Phormidium* gliding to the seedling root in a microfluidic channel covered with six layers of optical filters. *Phormidium* is hesitating at the entrance of the microfluidic channel. Images were taken every 7 min, and the movie plays at 3 frames/s.
